# Supplementary material for: Activation of biomass with volatilized KOH
Source: Royal Society of Chemistry journal article supplement (doi:10.1039/d2gc04245b), 2023-01-01
Supplement: d2gc04245b1.pdf [file d2gc04245b1.pdf]

## Supporting Information

### Activation of biomass with volatilized KOH

*Chao Li<sup>a</sup>, Yuannian Li<sup>a</sup>, Yuewen Shao<sup>a</sup>, Lijun Zhang<sup>a</sup>, Shu Zhang<sup>b</sup>, Shuang Wang<sup>c</sup>, Bin Li<sup>c</sup>, Zhenhua Cui<sup>d</sup>, Yonggui Tang<sup>d</sup>, Xun Hu<sup>a,\*</sup>*

<sup>a</sup>School of Material Science and Engineering, University of Jinan, Jinan, 250022, P. R. China

<sup>b</sup>Joint International Research Laboratory of Biomass Energy and Materials, College of Materials Science and Engineering, Nanjing Forestry University, Nanjing, 210037, P. R. China

<sup>c</sup>School of Energy and Power Engineering, Jiangsu University, Zhenjiang, 212013, P. R. China

<sup>d</sup>Shandong Basan Graphite New Material, Zibo, 255000, P. R. China

*Corresponding authors: [Xun.Hu@outlook.com](mailto:Xun.Hu@outlook.com) (X. Hu);*

**Table S1** Peak height and particle size of the biochar or activated carbon from the activation with KOH as activators with different activation methods

| Entry | Samples |                | Peak height       |                   | FWHM      |           |
|-------|---------|----------------|-------------------|-------------------|-----------|-----------|
|       |         |                | C (0 0 2)         | C (1 0 0)         | C (0 0 2) | C (1 0 0) |
| 1     | Biochar | Sawdust        | $1.3 \times 10^4$ | $1.2 \times 10^3$ | 0.5       | 0.3       |
| 2     | Biochar | Cellulose      | $1.3 \times 10^4$ | $1.6 \times 10^3$ | 0.7       | 0.7       |
| 3     | Biochar | Lignin         | $1.6 \times 10^4$ | $4.1 \times 10^3$ | 0.6       | 0.7       |
| 4     | AC      | DA-Sawdust     | $9.7 \times 10^4$ | $7.7 \times 10^3$ | 0.4       | 0.2       |
| 5     | AC      | DA-Cellulose   | $1.6 \times 10^5$ | $1.4 \times 10^4$ | 0.3       | 0.2       |
| 6     | AC      | DA-Lignin      | $1.1 \times 10^5$ | $7.8 \times 10^3$ | 0.3       | 0.1       |
| 7     | AC      | AVK-Sawdust    | $1.1 \times 10^5$ | $4.5 \times 10^3$ | 0.5       | 0.2       |
| 8     | AC      | AVK -Cellulose | $8.7 \times 10^4$ | $8.6 \times 10^3$ | 0.6       | 0.2       |
| 9     | AC      | AVK -Lignin    | $3.8 \times 10^4$ | $7.6 \times 10^3$ | 0.3       | 0.2       |

DA: Direct activation of the mixture of biomass and KOH with a mass ratio of 1:1;

AVK: Activation with volatilized KOH of biomass in the upper bed while KOH in the lower bed with a mass ratio of 1:1.

**Table S2** Abundance of the functional groups of the AC from the activation with KOH as activators with different activation methods

| Entry | Samples       | Abundance (a.u.) |      |      |                  |       |
|-------|---------------|------------------|------|------|------------------|-------|
|       |               | -OH              | =C-H | C-H  | -CH <sub>3</sub> | C-O-C |
| 1     | DA-Sawdust    | 0.04             | 0.01 | 0.02 | 0.01             | 0.05  |
| 2     | DA-Cellulose  | 0.05             | 0.01 | 0.04 | 0.01             | 0.10  |
| 3     | DA-Lignin     | 0.05             | 0.01 | 0.02 | 0.01             | 0.09  |
| 4     | AVK-Sawdust   | 0.07             | 0.02 | 0.04 | 0.02             | 0.11  |
| 5     | AVK-Cellulose | 0.06             | 0.01 | 0.03 | 0.02             | 0.07  |
| 6     | AVK-Lignin    | 0.05             | 0.01 | 0.03 | 0.01             | 0.11  |

DA: Direct activation of the mixture of biomass and KOH with a mass ratio of 1:1;

AVK: Activation with volatilized KOH of biomass in the upper bed while KOH in the lower bed with a mass ratio of 1:1.

**Table S3** Environmental impacts, energy consumption, and resource depletion for production of the AC

| <b>Feedstock</b>                                        | <b>DA-<br/>Sawdust</b> | <b>DA-<br/>Cellulose</b> | <b>DA-<br/>Lignin</b> | <b>AVK-<br/>Sawdust</b> | <b>AVK-<br/>Cellulose</b> | <b>AVK-<br/>Lignin</b> |
|---------------------------------------------------------|------------------------|--------------------------|-----------------------|-------------------------|---------------------------|------------------------|
| <b>Acidification<br/>(kg SO<sub>2</sub> eq)</b>         | 3.22E+05               | 2.46E+05                 | 2.57E+05              | 2.22E+05                | 2.48E+05                  | 1.91E+05               |
| <b>Carcinogenics<br/>(CTUh)</b>                         | 2.15E+02               | 1.64E+02                 | 1.71E+02              | 1.48E+02                | 1.66E+02                  | 1.28E+02               |
| <b>Ecotoxicity<br/>(CTUe)</b>                           | 3.14E+09               | 2.40E+09                 | 2.50E+09              | 2.17E+09                | 2.42E+09                  | 1.87E+09               |
| <b>Eutrophication<br/>(kg N eq)</b>                     | 2.45E+05               | 1.87E+05                 | 1.95E+05              | 1.69E+05                | 1.89E+05                  | 1.46E+05               |
| <b>Fossil fuel depletion<br/>(MJ surplus)</b>           | 5.63E+07               | 4.31E+07                 | 4.49E+07              | 3.89E+07                | 4.35E+07                  | 3.35E+07               |
| <b>Global warming<br/>(kg CO<sub>2</sub> eq)</b>        | 7.74E+07               | 5.93E+07                 | 6.17E+07              | 5.35E+07                | 5.97E+07                  | 4.60E+07               |
| <b>Non carcinogenics<br/>(CTUh)</b>                     | 7.77E+01               | 5.95E+01                 | 6.20E+01              | 5.37E+01                | 5.99E+01                  | 4.62E+01               |
| <b>Ozone depletion<br/>(kg CFC-11 eq)</b>               | 4.69E+00               | 3.59E+00                 | 3.74E+00              | 3.24E+00                | 3.62E+00                  | 2.79E+00               |
| <b>Respiratory effects<br/>(kg PM<sub>2.5</sub> eq)</b> | 1.12E+05               | 8.57E+04                 | 8.93E+04              | 7.74E+04                | 8.64E+04                  | 6.66E+04               |
| <b>Smog (kg O<sub>3</sub> eq)</b>                       | 4.56E+06               | 3.49E+06                 | 3.63E+06              | 3.15E+06                | 3.52E+06                  | 2.71E+06               |

DA: Direct activation of the mixture of biomass and KOH with a mass ratio of 1:1;

AVK: Activation with volatilized KOH of biomass in the upper bed while KOH in the lower bed with a mass ratio of 1:1.

**Table S4** Input and output on the basis of production of 1 ton of AC

| <b>Feedstock</b>                   | <b>DA-Sawdust</b> | <b>DA-Cellulose</b> | <b>DA-Lignin</b> |             |
|------------------------------------|-------------------|---------------------|------------------|-------------|
| <b>Input/Output</b>                | <b>Quantity</b>   |                     |                  | <b>Unit</b> |
| <b>Step 1: Transportation</b>      |                   |                     |                  |             |
| <b>Input</b>                       |                   |                     |                  |             |
| Feedstock                          | 11570.9           | 8306.1              | 8925.9           | kg          |
| transportation                     | 11.5              | 8.3                 | 8.9              | tkm         |
| <b>Output</b>                      |                   |                     |                  |             |
| Feedstock,<br>after transportation | 10992.3           | 7890.8              | 8479.0           | kg          |
| <b>Step 2: Pretreatment</b>        |                   |                     |                  |             |
| <b>Input</b>                       |                   |                     |                  |             |
| Feedstock,<br>after transportation | 10992.3           | -                   | 8479.0           | kg          |
| Electricity                        | 27700.8           | -                   | 21367.0          | MJ          |
| Deionized water                    | 32977.1           | -                   | 25436.9          | kg          |
| Hydrochloric acid                  | 3790.2            | -                   | -                | kg          |
| Sulfuric acid                      | -                 | -                   | 423.9            | kg          |
| <b>Output</b>                      |                   |                     |                  |             |
| Feedstock,<br>after pretreatment   | 9893.1            | -                   | 7631.1           | kg          |
| Wastewater                         | 32977.1           | -                   | 25436.9          | kg          |
| <b>Step 3: Grinding</b>            |                   |                     |                  |             |
| <b>Input</b>                       |                   |                     |                  |             |
| Feedstock,                         | 32977.1           | -                   | 25436.9          | kg          |

|                               |        |        |        |                |
|-------------------------------|--------|--------|--------|----------------|
| after pretreatment            |        |        |        |                |
| Electricity                   | 783.5  | 625.0  | 604.4  | MJ             |
| <b>Output</b>                 |        |        |        |                |
| Feedstock,<br>after grinding  | 9398.4 | 7496.3 | 7249.5 | kg             |
| <b>Step 4: Activation</b>     |        |        |        |                |
| <b>Input</b>                  |        |        |        |                |
| Feedstock,<br>after grinding  | 9398.4 | 7496.3 | 7249.5 | kg             |
| Natural gas                   | 6286.7 | 5014.3 | 4849.3 | m <sup>3</sup> |
| Electricity                   | 84.5   | 67.5   | 65.2   | MJ             |
| KOH                           | 9398.5 | 7496.3 | 7249.5 | kg             |
| <b>Output</b>                 |        |        |        |                |
| Mixture                       | 1785.7 | 1724.1 | 1754.4 | kg             |
| Waste gas                     | 7612.8 | 5772.1 | 5495.1 | kg             |
| <b>Step 5: Post-treatment</b> |        |        |        |                |
| <b>Input</b>                  |        |        |        |                |
| Mixture                       | 1785.7 | 1724.1 | 1754.4 | kg             |
| Hydrochloric acid             | 615.7  | 594.5  | 587.4  | kg             |
| Deionized water               | 5357.1 | 5172.4 | 5263.2 | kg             |
| <b>Outputs</b>                |        |        |        |                |
| AC                            | 1000   | 1000   | 1000   | kg             |
| wastewater                    | 5357.1 | 5172.4 | 5263.2 | kg             |

DA: Direct activation of the mixture of biomass and KOH with a mass ratio of 1:1.

**Table S5** Input and output on the basis of production of 1 ton of AC

| <b>Feedstock</b>                   | <b>AVK-Sawdust</b> | <b>AVK-Cellulose</b> | <b>AVK-Lignin</b> |             |
|------------------------------------|--------------------|----------------------|-------------------|-------------|
| <b>Input/Output</b>                | <b>Quantity</b>    |                      |                   | <b>Unit</b> |
| <b>Step 1: Transportation</b>      |                    |                      |                   |             |
| <b>Input</b>                       |                    |                      |                   |             |
| Feedstock                          | 8414.3             | 6835.3               | 6534.0            | kg          |
| transportation                     | 8.4                | 6.8                  | 6.5               | tkm         |
| <b>Output</b>                      |                    |                      |                   |             |
| Feedstock,<br>after transportation | 7993.6             | 6493.5               | 6207.3            | kg          |
| <b>Step 2: Pretreatment</b>        |                    |                      |                   |             |
| <b>Input</b>                       |                    |                      |                   |             |
| Feedstock,<br>after transportation | 7993.6             | -                    | 6207.3            | kg          |
| Electricity                        | 20143.9            | -                    | 15642.5           | MJ          |
| Deionized water                    | 23980.8            | -                    | 18621.9           | kg          |
| Hydrochloric acid                  | 2756.2             | -                    | -                 | kg          |
| Sulfuric acid                      | -                  | -                    | 310.4             | kg          |
| <b>Output</b>                      |                    |                      |                   |             |
| Feedstock,<br>after pretreatment   | 7194.2             | -                    | 5586.6            | kg          |
| Wastewater                         | 23980.8            | -                    | 18621.9           | kg          |
| <b>Step 3: Activation</b>          |                    |                      |                   |             |
| <b>Input</b>                       |                    |                      |                   |             |
| Feedstock,                         | 7194.2             | 6493.5               | 5586.6            | kg          |

| after pretreatment |        |        |        |                |
|--------------------|--------|--------|--------|----------------|
| Natural gas        | 4812.3 | 4343.6 | 3736.9 | m <sup>3</sup> |
| Electricity        | 64.7   | 58.4   | 50.3   | MJ             |
| KOH                | 7194.2 | 6493.5 | 5586.6 | kg             |
| <b>Output</b>      |        |        |        |                |
| AC                 | 1000   | 1000   | 1000   | kg             |
| Waste gas          | 6194.2 | 5493.5 | 4586.6 | kg             |
| Waste KOH          | 2474.8 | 2194.8 | 1877.1 | kg             |

AVK: Activation with volatilized KOH of biomass in the upper bed while KOH in the lower bed with a mass ratio of 1:1.



**Table S6** E-factor and material efficiency data for production of the AC<sup>a</sup>

| <b>Entry</b> | <b>Samples<sup>b</sup></b> | <b>E-factor</b> | <b>Material efficiency</b> |
|--------------|----------------------------|-----------------|----------------------------|
| <b>1</b>     | <b>DA-Sawdust</b>          | 45.9            | $2.1 \times 10^{-2}$       |
| <b>2</b>     | <b>DA-Cellulose</b>        | 10.9            | $8.3 \times 10^{-2}$       |
| <b>3</b>     | <b>DA-Lignin</b>           | 36.2            | $2.7 \times 10^{-2}$       |
| <b>4</b>     | <b>AVK-Sawdust</b>         | 30.1            | $3.2 \times 10^{-2}$       |
| <b>5</b>     | <b>AVK -Cellulose</b>      | 2.2             | $3.1 \times 10^{-1}$       |
| <b>6</b>     | <b>AVK -Lignin</b>         | 20.5            | $4.7 \times 10^{-2}$       |

$${}^a\text{E (environmental) – factor} = \frac{\text{Mass of wastes}}{\text{Mass of products}},$$

$$\text{Material efficiency} = \frac{\text{Mass of products}}{\text{Mass of products} + \text{Mass of wastes}},$$

calculated considering output of wastewater and waste gas as waste, and activated carbon as product; The data could refer to the Table S4 and S5;

<sup>b</sup>DA: Direct activation of the mixture of biomass and KOH with a mass ratio of 1:1;

AVK: Activation with volatilized KOH of biomass in the upper bed while KOH in the lower bed with a mass ratio of 1:1.

**Table S7** Pore characteristics of the biochar and activated carbon (AC) from the activation of various feedstocks in the absence/presence of activator

| Entry |         | Samples*                             | S <sub>BET</sub><br>(m <sup>2</sup> /g) | V <sub>b</sub> <sup>a</sup><br>(cm <sup>3</sup> /g) | D <sub>a</sub> <sup>c</sup><br>(nm) | S <sub>micro</sub> <sup>b</sup><br>(m <sup>2</sup> /g) | V <sub>micro</sub> <sup>d</sup><br>(cm <sup>3</sup> /g) |
|-------|---------|--------------------------------------|-----------------------------------------|-----------------------------------------------------|-------------------------------------|--------------------------------------------------------|---------------------------------------------------------|
| 1     | AC      | AVA-<br>Sawdust (ZnCl <sub>2</sub> ) | 704.1                                   | 0.32                                                | 0.92                                | 103.3 (14.7)                                           | 0.08                                                    |
| 2     | Biochar | Ceiba                                | 110.4                                   | 0.06                                                | 1.1                                 | 34.7 (31.4)                                            | 0.02                                                    |
| 3     | AC      | AVK-<br>Ceiba (KOH)                  | 118.6                                   | 0.09                                                | 1.6                                 | 92.1 (77.7)                                            | 0.04                                                    |
| 4     | Biochar | Walnut shell                         | 107.1                                   | 0.06                                                | 1.2                                 | 0 (0)                                                  | 0                                                       |
| 5     | AC      | AVK-<br>Walnut shell (KOH)           | 152.0                                   | 0.08                                                | 1.1                                 | 62.3 (41.0)                                            | 0.03                                                    |
| 6     | Biochar | Pine needle                          | 88.4                                    | 0.05                                                | 1.2                                 | 46.9 (53.1)                                            | 0.02                                                    |
| 7     | AC      | AVK-<br>Pine needle (KOH)            | 119.6                                   | 0.1                                                 | 1.7                                 | 92.2 (77.1)                                            | 0.04                                                    |

<sup>a</sup>Total pore volume at P/P<sub>0</sub> = 0.99; <sup>b</sup>Micropore surface area, the percentage of S<sub>micro</sub>/S<sub>BET</sub> is given in parentheses; <sup>c</sup>Average pore diameter; <sup>d</sup>Micropore volume;

\* DA: Direct activation of the mixture of biomass and KOH with a mass ratio of 1:1;

AVA: Activation with volatilized activator of biomass in the upper bed while KOH in the lower bed with a mass ratio of 1:1;

AVK: Activation with volatilized KOH of biomass in the upper bed while KOH in the lower bed with a mass ratio of 1:1.

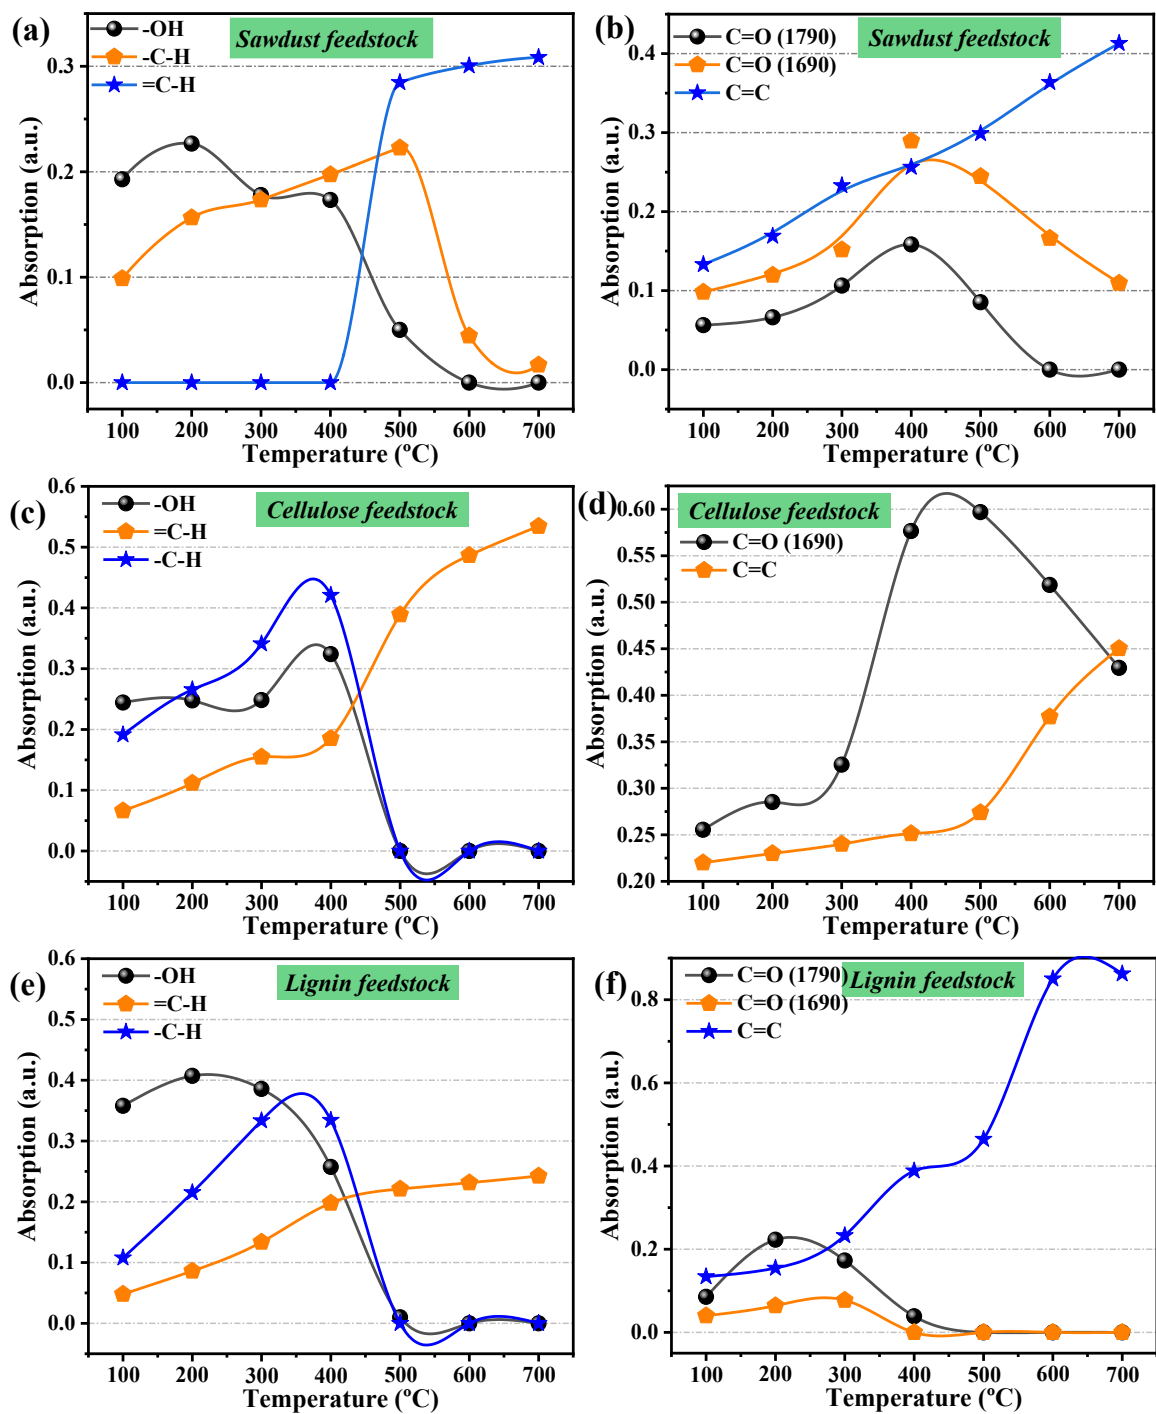

**Fig. S1** Abundance of various functional groups derived from the in-situ DRIFTS spectra of different feedstocks; (a): Sawdust feedstock; (b): Cellulose feedstock; (c): Lignin feedstock.

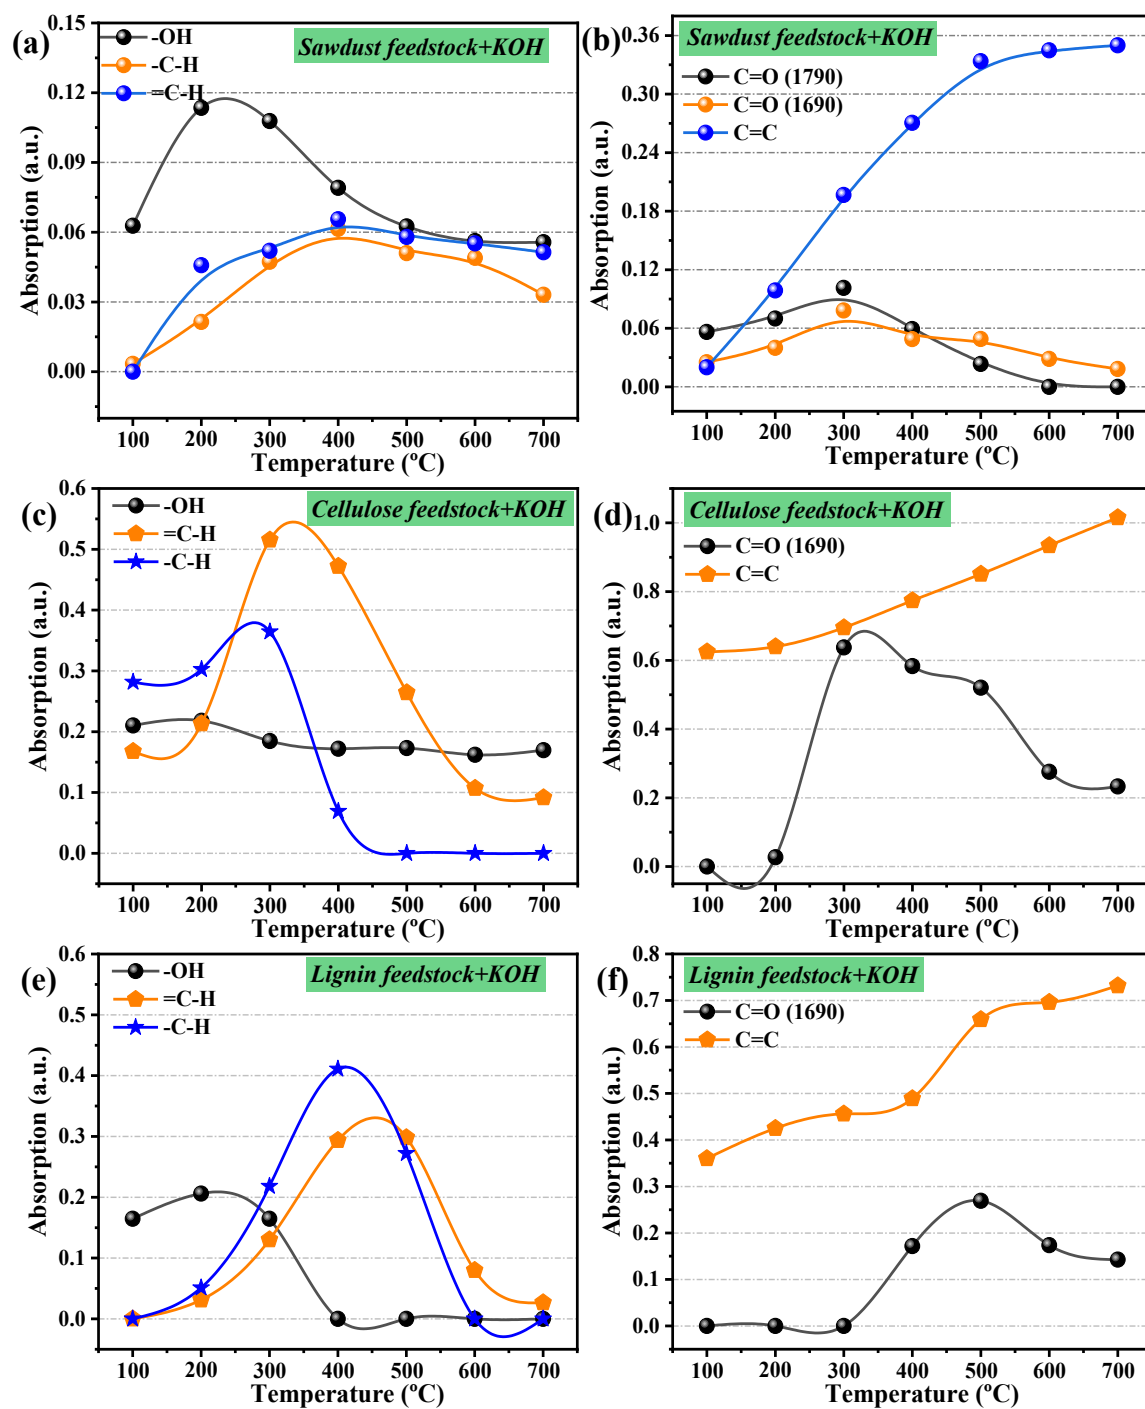

**Fig. S2** Abundance of various functional groups derived from the in-situ DRIFTS spectra of different feedstocks; (a): Mixture of sawdust feedstock and KOH; (b): Mixture of cellulose feedstock and KOH; (c): Mixture of lignin feedstock and KOH.

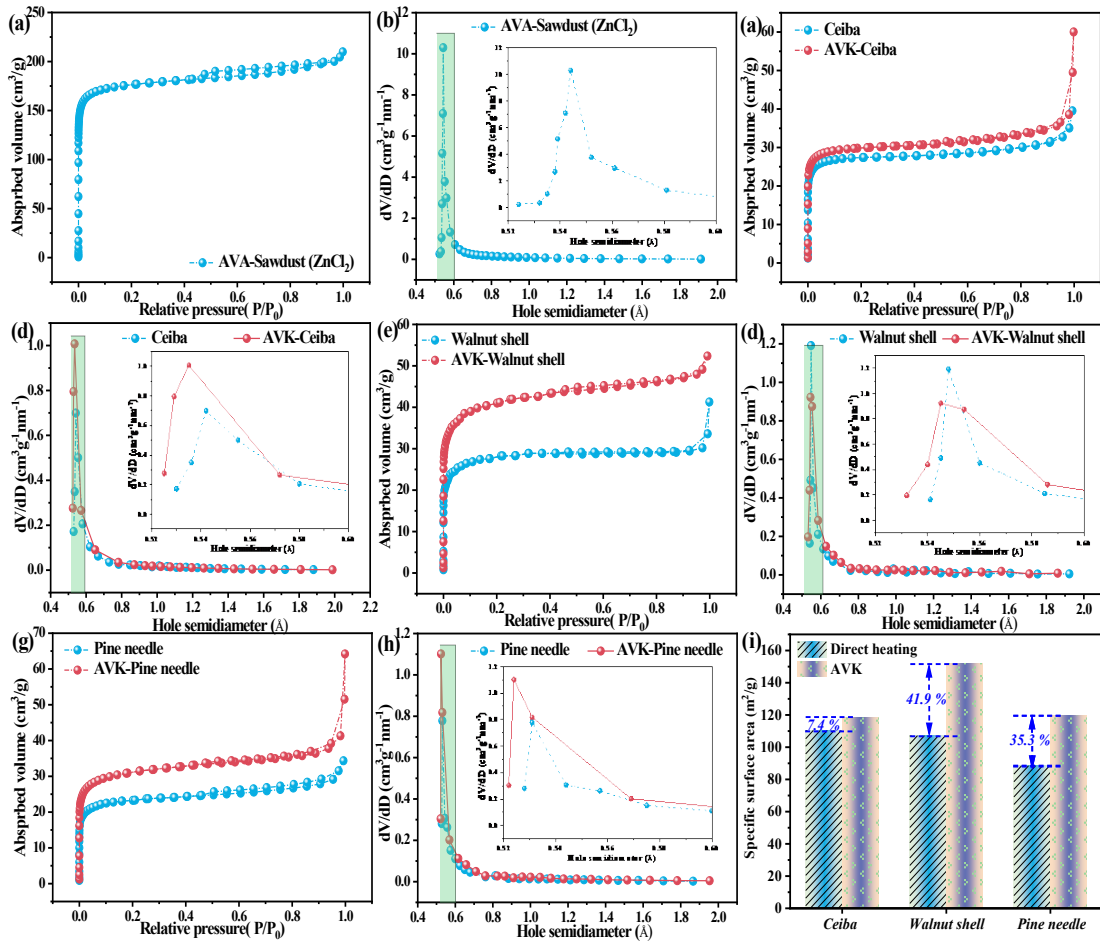

**Fig. S3** Pore structure analysis of the biochar or AC from the activation of various feedstocks in the absence/presence of activator; (a and b): AC from activation with volatilized ZnCl<sub>2</sub> as activator; (c and d): Activation of ceiba; (e and f): Activation of walnut shell; (g and h): Activation of pine needle; (i): Specific surface area of the biochar or AC; AVA: Activation with volatilized activator of biomass in the upper bed while KOH in the lower bed with a mass ratio of 1:1; AVK: Activation with volatilized KOH of biomass in the upper bed while KOH in the lower bed with a mass ratio of 1:1.

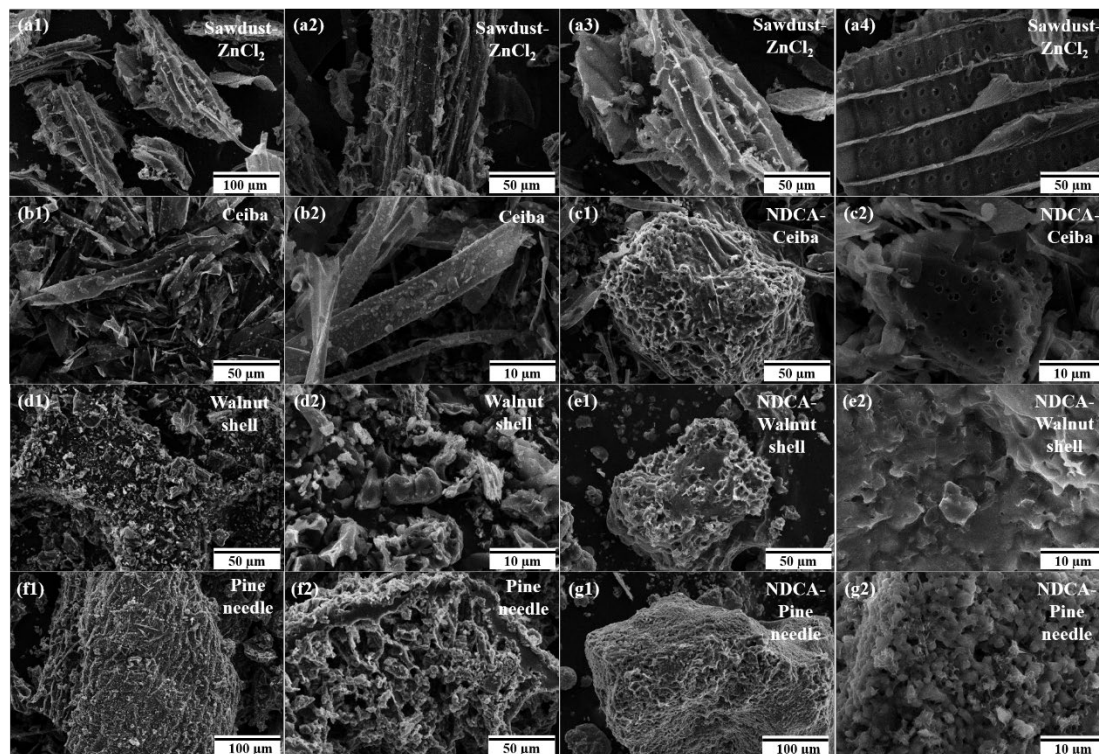

**Fig. S4** SEM analysis of the biochar or AC from the activation of various feedstocks in the absence/presence of activator; (a): AC from activation with volatilized  $ZnCl_2$  as activator; (b): Biochar from direct heating of ceiba; (c): AC from activation with volatilized KOH of ceiba; (d): Biochar from direct heating of walnut shell; (e): AC from activation with volatilized KOH of walnut shell; walnut shell; (f): Biochar from direct heating of pine needle; (g): AC from activation with volatilized KOH of pine needle; AVK: Activation with volatilized KOH of biomass in the upper bed while KOH in the lower bed with a mass ratio of 1:1.
